# Supplementary material for: Assessing the bioactive potential of Lysimachia atropurpurea extracts using HPLC-MS/MS, in vitro and in silico analysis
Source: publisher site journal article supplement (doi:10.1515/znc-2025-0220), 2025-12-08
Supplement: Supplementary file 1 [file j_znc-2025-0220_suppl_001.docx]

| **Table S1** The docking results of 12 compounds from *L. atropurpurea* against seven metabolic enzymes. | | | | | | |
| --- | --- | --- | --- | --- | --- | --- |
| **Receptor** | **Ligand** | **Affinity (kcal/mol)** | **H-Bonds** | **Salt Bridges** | **Hydrophobic** | **π-π Stacks** |
| AChE | Anolobine | -11,24 | 2 | 0 | 8 | 0 |
| AChE | Chryseriol | -9,545 | 1 | 0 | 7 | 0 |
| AChE | Dicaffeic acid | -9,468 | 0 | 0 | 7 | 0 |
| AChE | Dihydroquercetin | -9,769 | 7 | 0 | 4 | 0 |
| AChE | Dihydroxyflavan | -9,6 | 1 | 0 | 5 | 2 |
| AChE | Gallocatechin | -9,674 | 5 | 0 | 4 | 0 |
| AChE | Kaempferide | -9,591 | 1 | 0 | 5 | 2 |
| AChE | Myricetin-3-O-hexosyl(1-2)deoxyhexoside | -8,67 | 8 | 0 | 2 | 0 |
| AChE | Prodelphinidin B1 | -7,784 | 6 | 0 | 2 | 0 |
| AChE | Prolithospermic acid | -9,415 | 3 | 0 | 5 | 0 |
| AChE | Quercetin | -10,01 | 7 | 0 | 3 | 0 |
| AChE | α-carboxyethylhydroxychroman | -9,9 | 3 | 1 | 5 | 1 |
| Amylase | Anolobine | -8,713 | 2 | 0 | 5 | 1 |
| Amylase | Chryseriol | -8,83 | 4 | 0 | 5 | 0 |
| Amylase | Dicaffeic acid | -7,989 | 3 | 0 | 5 | 0 |
| Amylase | Dihydroquercetin | -8,895 | 6 | 0 | 3 | 0 |
| Amylase | Dihydroxyflavan | -8,422 | 4 | 0 | 4 | 0 |
| Amylase | Gallocatechin | -8,576 | 7 | 0 | 3 | 0 |
| Amylase | Kaempferide | -7,664 | 5 | 0 | 5 | 0 |
| Amylase | Myricetin-3-O-hexosyl(1-2)deoxyhexoside | -9,579 | 10 | 0 | 1 | 0 |
| Amylase | Prodelphinidin B1 | -10,18 | 13 | 0 | 3 | 1 |
| Amylase | Prolithospermic acid | -8,583 | 1 | 2 | 5 | 1 |
| Amylase | Quercetin | -8,494 | 6 | 0 | 5 | 1 |
| Amylase | α-carboxyethylhydroxychroman | -8,303 | 1 | 2 | 8 | 1 |
| BChE | Anolobine | -9,816 | 1 | 0 | 3 | 0 |
| BChE | Chryseriol | -9,139 | 4 | 0 | 0 | 0 |
| BChE | Dicaffeic acid | -8,611 | 4 | 0 | 3 | 0 |
| BChE | Dihydroquercetin | -9,616 | 5 | 0 | 3 | 0 |
| BChE | Dihydroxyflavan | -8,671 | 2 | 0 | 5 | 0 |
| BChE | Gallocatechin | -9,285 | 6 | 0 | 1 | 2 |
| BChE | Kaempferide | -9,303 | 2 | 0 | 2 | 2 |
| BChE | Myricetin-3-O-hexosyl(1-2)deoxyhexoside | -10,77 | 6 | 0 | 1 | 0 |
| BChE | Prodelphinidin B1 | -11,6 | 8 | 0 | 3 | 0 |
| BChE | Prolithospermic acid | -9,702 | 5 | 0 | 3 | 2 |
| BChE | Quercetin | -9,689 | 4 | 0 | 1 | 2 |
| BChE | α-carboxyethylhydroxychroman | -9,061 | 5 | 1 | 6 | 0 |
| Glucosidase | Anolobine | -8,308 | 4 | 0 | 6 | 0 |
| Glucosidase | Chryseriol | -7,658 | 5 | 0 | 2 | 0 |
| Glucosidase | Dicaffeic acid | -7,403 | 3 | 1 | 5 | 0 |
| Glucosidase | Dihydroquercetin | -8,004 | 5 | 0 | 6 | 0 |
| Glucosidase | Dihydroxyflavan | -7,456 | 2 | 0 | 3 | 0 |
| Glucosidase | Gallocatechin | -8,079 | 7 | 0 | 2 | 0 |
| Glucosidase | Kaempferide | -7,747 | 5 | 0 | 2 | 0 |
| Glucosidase | Myricetin-3-O-hexosyl(1-2)deoxyhexoside | -8,308 | 7 | 1 | 1 | 0 |
| Glucosidase | Prodelphinidin B1 | -8,769 | 8 | 0 | 4 | 0 |
| Glucosidase | Prolithospermic acid | -7,862 | 8 | 0 | 5 | 0 |
| Glucosidase | Quercetin | -8,132 | 5 | 0 | 1 | 0 |
| Glucosidase | α-carboxyethylhydroxychroman | -7,686 | 5 | 0 | 4 | 1 |
| Tyrosinase | Anolobine | -6,658 | 3 | 0 | 4 | 0 |
| Tyrosinase | Chryseriol | -8,048 | 5 | 0 | 2 | 0 |
| Tyrosinase | Dicaffeic acid | -6,469 | 3 | 1 | 5 | 0 |
| Tyrosinase | Dihydroquercetin | -7,775 | 5 | 0 | 1 | 1 |
| Tyrosinase | Dihydroxyflavan | -7,975 | 7 | 0 | 5 | 1 |
| Tyrosinase | Gallocatechin | -7,19 | 2 | 0 | 2 | 2 |
| Tyrosinase | Kaempferide | -7,016 | 6 | 0 | 2 | 0 |
| Tyrosinase | Myricetin-3-O-hexosyl(1-2)deoxyhexoside | -7,501 | 4 | 0 | 2 | 0 |
| Tyrosinase | Prodelphinidin B1 | -7,628 | 5 | 0 | 1 | 0 |
| Tyrosinase | Prolithospermic acid | -7,681 | 6 | 2 | 2 | 0 |
| Tyrosinase | Quercetin | -8,234 | 5 | 0 | 1 | 2 |
| Tyrosinase | α-carboxyethylhydroxychroman | -6,67 | 0 | 6 | 4 | 0 |
| hCA-I | Anolobine | -8,558 | 5 | 0 | 3 | 0 |
| hCA-I | Chryseriol | -8,015 | 5 | 0 | 3 | 2 |
| hCA-I | Dicaffeic acid | -8,064 | 6 | 3 | 6 | 0 |
| hCA-I | Dihydroquercetin | -7,866 | 4 | 0 | 3 | 1 |
| hCA-I | Dihydroxyflavan | -8,054 | 1 | 0 | 7 | 1 |
| hCA-I | Gallocatechin | -7,693 | 4 | 0 | 4 | 0 |
| hCA-I | Kaempferide | -7,953 | 6 | 0 | 3 | 0 |
| hCA-I | Myricetin-3-O-hexosyl(1-2)deoxyhexoside | -7,921 | 6 | 2 | 5 | 0 |
| hCA-I | Prodelphinidin B1 | -8,692 | 6 | 0 | 4 | 0 |
| hCA-I | Prolithospermic acid | -7,897 | 5 | 1 | 2 | 0 |
| hCA-I | Quercetin | -8,189 | 7 | 0 | 2 | 2 |
| hCA-I | α-carboxyethylhydroxychroman | -8,189 | 5 | 2 | 5 | 0 |
| hCA-II | Anolobine | -7,797 | 5 | 0 | 2 | 0 |
| hCA-II | Chryseriol | -7,867 | 4 | 0 | 3 | 0 |
| hCA-II | Dicaffeic acid | -7,624 | 6 | 3 | 2 | 0 |
| hCA-II | Dihydroquercetin | -8,172 | 6 | 0 | 3 | 0 |
| hCA-II | Dihydroxyflavan | -7,71 | 3 | 0 | 6 | 0 |
| hCA-II | Gallocatechin | -7,724 | 6 | 0 | 1 | 0 |
| hCA-II | Kaempferide | -7,495 | 4 | 0 | 2 | 0 |
| hCA-II | Myricetin-3-O-hexosyl(1-2)deoxyhexoside | -8,363 | 8 | 1 | 2 | 0 |
| hCA-II | Prodelphinidin B1 | -7,708 | 9 | 0 | 1 | 1 |
| hCA-II | Prolithospermic acid | -8,127 | 6 | 1 | 3 | 1 |
| hCA-II | Quercetin | -7,903 | 3 | 0 | 2 | 0 |
| hCA-II | α-carboxyethylhydroxychroman | -7,525 | 3 | 1 | 2 | 0 |
