# Supplementary material for: Assessing the bioactive potential of Lysimachia atropurpurea extracts using HPLC-MS/MS, in vitro and in silico analysis
Source: publisher site journal article supplement (doi:10.1515/znc-2025-0220), 2025-12-08
Supplement: Supplementary file 2 [file j_znc-2025-0220_suppl_002.docx]

| **Table S2** Correlation Coefficient Summary (Compound existence - Enzyme inhibitory activity - Binding energy) | | | | | | |
| --- | --- | --- | --- | --- | --- | --- |
| **Enzyme** | **Max Value Method ρ** | **p-value** | **Mean Value Method ρ** | **p-value** | **Summation Method ρ** | **p-value** |
| **AChE** | 0,83 | 0.011* | 0,71 | 0.048* | 0,69 | 0,058 |
| **Amylase** | 0,24 | 0,572 | 0,19 | 0,651 | 0,21 | 0,612 |
| **BChE** | 0,91 | 0.002** | 0,76 | 0.028* | 0,74 | 0.035* |
| **Glucosidase** | 0,45 | 0,198 | 0,38 | 0,29 | 0,41 | 0,247 |
| **Tyrosinase** | 0,79 | 0.021* | 0,62 | 0,102 | 0,58 | 0,132 |
| **hCA-I** | 0,62 | 0,078 | 0,54 | 0,138 | 0,5 | 0,17 |
| **hCA-II** | 0,58 | 0,112 | 0,48 | 0,198 | 0,45 | 0,224 |
