# Supplementary material for: Assessing the bioactive potential of Lysimachia atropurpurea extracts using HPLC-MS/MS, in vitro and in silico analysis
Source: publisher site journal article supplement (doi:10.1515/znc-2025-0220), 2025-12-08
Supplement: Supplementary file 3 [file j_znc-2025-0220_suppl_003.docx]

| **Table S3** The contribution of compounds (calculated using multiple linear regression) | | | | | |
| --- | --- | --- | --- | --- | --- |
| **Proteases** | **Compounds** | **Contribution coefficient** | **p value** | **Order of importance** | **Contribution of direction** |
| AChE | Anolobine | 2,15 | 0,003 | 1 | **+** |
| Quercetin | 1,08 | 0,018 | 2 | **+** |
| α-carboxyethylhydroxychroman | -0,72 | 0,026 | 3 | **-** |
| Dihydroquercetin | 0,41 | 0,152 | 4 | **+** |
| Dicaffeic acid | 0,32 | 0,21 | 5 | **+** |
| Prolithospermic acid | -0,25 | 0,285 | 6 | **-** |
| BChE | Prodelphinidin B1 | 2,38 | <0.001 | 1 | **+** |
| Myricetin derivative | 1,35 | 0,004 | 2 | **+** |
| Dihydroquercetin | 0,85 | 0,012 | 3 | **+** |
| Anolobine | 0,62 | 0,038 | 4 | **+** |
| Prolithospermic acid | 0,51 | 0,075 | 5 | **+** |
| Quercetin | 0,33 | 0,142 | 6 | **+** |
| Tyrosinase | Quercetin | 22,5 | 0,001 | 1 | **+** |
| Dihydroquercetin | 16,8 | 0,003 | 2 | **+** |
| Chryseriol | 12,3 | 0,008 | 3 | **+** |
| Gallocatechin | -8,7 | 0,022 | 4 | **-** |
| Prolithospermic acid | 6,2 | 0,065 | 5 | **+** |
| Kaempferide | 4,5 | 0,132 | 6 | **+** |
| Amylase | Prodelphinidin B1 | 0,25 | 0,028 | 1 | **+** |
| Dihydroquercetin | 0,21 | 0,041 | 2 | **+** |
| Myricetin derivative | 0,13 | 0,098 | 3 | **+** |
| Gallocatechin | 0,11 | 0,152 | 4 | **+** |
| Chryseriol | 0,08 | 0,23 | 5 | **+** |
| Prolithospermic acid | 0,05 | 0,351 | 6 | **+** |
| Glucosidase | Myricetin derivative | 0,92 | 0,005 | 1 | **+** |
| Prodelphinidin B1 | 0,67 | 0,014 | 2 | **+** |
| Quercetin | 0,42 | 0,032 | 3 | **+** |
| Gallocatechin | 0,31 | 0,078 | 4 | **+** |
| Dihydroquercetin | 0,25 | 0,121 | 5 | **+** |
| Anolobine | 0,18 | 0,21 | 6 | **+** |
| hCA-I | Anolobine | 0,033 | 0,026 | 1 | **+** |
| Dicaffeic acid | 0,024 | 0,045 | 2 | **+** |
| Quercetin | -0,02 | 0,038 | 3 | **-** |
| Prodelphinidin B1 | 0,018 | 0,092 | 4 | **+** |
| Chryseriol | 0,015 | 0,132 | 5 | **+** |
| Kaempferide | 0,011 | 0,21 | 6 | **+** |
| hCA-II | Myricetin derivative | 0,038 | 0,004 | 1 | **+** |
| Dihydroquercetin | 0,028 | 0,011 | 2 | **+** |
| Prolithospermic acid | -0,022 | 0,018 | 3 | **-** |
| Gallocatechin | 0,018 | 0,048 | 4 | **+** |
| Quercetin | 0,015 | 0,095 | 5 | **+** |
| Anolobine | 0,011 | 0,152 | 6 | **+** |
