# Supplementary material for: Assessing the bioactive potential of Lysimachia atropurpurea extracts using HPLC-MS/MS, in vitro and in silico analysis
Source: publisher site journal article supplement (doi:10.1515/znc-2025-0220), 2025-12-08
Supplement: Supplementary file 4 [file j_znc-2025-0220_suppl_004.docx]

| **Table S4** The docking results of 10 compounds from *L. atropurpurea* against six oncogenic targets. | | | | | | |
| --- | --- | --- | --- | --- | --- | --- |
| **Receptor** | **Ligand** | **Affinity (kcal/mol)** | **H-Bonds** | **Salt Bridges** | **Hydrophobic** | **π-π Stacks** |
| AKT1 | Anolobine | -8,594 | 1 | 0 | 6 | 0 |
| AKT1 | Chryseriol | -8,793 | 6 | 0 | 5 | 0 |
| AKT1 | Dicaffeic acid | -8,454 | 3 | 0 | 7 | 0 |
| AKT1 | [Dihydroxyflavan](https://pubchem.ncbi.nlm.nih.gov/compound/158280) | -7,802 | 3 | 0 | 7 | 0 |
| AKT1 | Kaempferide | -8,205 | 2 | 0 | 6 | 0 |
| AKT1 | Myricetin-3-O-hexosyl(1-2)deoxyhexoside | -9,551 | 9 | 0 | 1 | 0 |
| AKT1 | Prodelphinidin B1 | -7,62 | 10 | 0 | 0 | 0 |
| AKT1 | Prolithospermic acid | -8,568 | 6 | 2 | 2 | 0 |
| AKT1 | Quercetin | -8,425 | 6 | 0 | 4 | 0 |
| AKT1 | α-carboxyethylhydroxychroman | -7,348 | 6 | 0 | 3 | 0 |
| ERα | Anolobine | -9,45 | 2 | 0 | 4 | 0 |
| ERα | Chryseriol | -8,208 | 3 | 0 | 7 | 0 |
| ERα | Dicaffeic acid | -7,946 | 1 | 1 | 6 | 1 |
| ERα | [Dihydroxyflavan](https://pubchem.ncbi.nlm.nih.gov/compound/158280) | -8,785 | 1 | 0 | 3 | 0 |
| ERα | Kaempferide | -7,576 | 0 | 0 | 9 | 0 |
| ERα | Myricetin-3-O-hexosyl(1-2)deoxyhexoside | -4,713 | 5 | 0 | 8 | 0 |
| ERα | Prodelphinidin B1 | 0,9253 | 6 | 0 | 7 | 0 |
| ERα | Prolithospermic acid | -8,379 | 2 | 1 | 9 | 0 |
| ERα | Quercetin | -8,022 | 5 | 0 | 4 | 0 |
| ERα | α-carboxyethylhydroxychroman | -8,001 | 2 | 0 | 5 | 0 |
| HSP90α | Anolobine | -10,18 | 1 | 0 | 5 | 1 |
| HSP90α | Chryseriol | -9,653 | 4 | 0 | 7 | 0 |
| HSP90α | Dicaffeic acid | -8,88 | 3 | 0 | 4 | 0 |
| HSP90α | [Dihydroxyflavan](https://pubchem.ncbi.nlm.nih.gov/compound/158280) | -9,069 | 0 | 0 | 4 | 0 |
| HSP90α | Kaempferide | -9,535 | 3 | 0 | 3 | 1 |
| HSP90α | Myricetin-3-O-hexosyl(1-2)deoxyhexoside | -9,273 | 9 | 0 | 2 | 0 |
| HSP90α | Prodelphinidin B1 | -10,32 | 7 | 0 | 3 | 0 |
| HSP90α | Prolithospermic acid | -8,977 | 7 | 0 | 1 | 1 |
| HSP90α | Quercetin | -9,255 | 3 | 0 | 5 | 1 |
| HSP90α | α-carboxyethylhydroxychroman | -9,408 | 3 | 0 | 8 | 0 |
| HSP90β | Anolobine | -8,868 | 1 | 0 | 4 | 0 |
| HSP90β | Chryseriol | -7,991 | 3 | 0 | 4 | 0 |
| HSP90β | Dicaffeic acid | -8,414 | 4 | 0 | 0 | 0 |
| HSP90β | [Dihydroxyflavan](https://pubchem.ncbi.nlm.nih.gov/compound/158280) | -7,207 | 7 | 0 | 0 | 0 |
| HSP90β | Kaempferide | -7,917 | 3 | 0 | 3 | 0 |
| HSP90β | Myricetin-3-O-hexosyl(1-2)deoxyhexoside | -9,906 | 11 | 1 | 2 | 0 |
| HSP90β | Prodelphinidin B1 | -10,07 | 14 | 0 | 3 | 0 |
| HSP90β | Prolithospermic acid | -8,371 | 8 | 0 | 1 | 0 |
| HSP90β | Quercetin | -8,035 | 3 | 0 | 1 | 0 |
| HSP90β | α-carboxyethylhydroxychroman | -8,215 | 4 | 0 | 5 | 0 |
| PI3Kα | Anolobine | -9,523 | 4 | 0 | 2 | 1 |
| PI3Kα | Chryseriol | -8,512 | 5 | 0 | 1 | 1 |
| PI3Kα | Dicaffeic acid | -7,829 | 1 | 3 | 3 | 1 |
| PI3Kα | [Dihydroxyflavan](https://pubchem.ncbi.nlm.nih.gov/compound/158280) | -8,136 | 2 | 0 | 5 | 1 |
| PI3Kα | Kaempferide | -8,168 | 4 | 0 | 5 | 1 |
| PI3Kα | Myricetin-3-O-hexosyl(1-2)deoxyhexoside | -8,481 | 12 | 2 | 1 | 0 |
| PI3Kα | Prodelphinidin B1 | -9,606 | 13 | 0 | 1 | 0 |
| PI3Kα | Prolithospermic acid | -8,191 | 5 | 1 | 3 | 0 |
| PI3Kα | Quercetin | -8,268 | 9 | 0 | 0 | 1 |
| PI3Kα | α-carboxyethylhydroxychroman | -8,016 | 4 | 0 | 11 | 0 |
| SRC | Anolobine | -7,487 | 2 | 0 | 3 | 0 |
| SRC | Chryseriol | -7,52 | 2 | 0 | 5 | 0 |
| SRC | Dicaffeic acid | -7,126 | 2 | 1 | 3 | 0 |
| SRC | [Dihydroxyflavan](https://pubchem.ncbi.nlm.nih.gov/compound/158280) | -7,525 | 4 | 0 | 7 | 0 |
| SRC | Kaempferide | -6,499 | 2 | 0 | 2 | 0 |
| SRC | Myricetin-3-O-hexosyl(1-2)deoxyhexoside | -8,523 | 8 | 0 | 3 | 0 |
| SRC | Prodelphinidin B1 | -7,02 | 7 | 0 | 5 | 0 |
| SRC | Prolithospermic acid | -7,378 | 1 | 0 | 3 | 0 |
| SRC | Quercetin | -7,323 | 5 | 0 | 5 | 1 |
| SRC | α-carboxyethylhydroxychroman | -7,282 | 2 | 1 | 5 | 0 |
